# Supplementary material
Source: PubMed Central journal article supplement (PMC6391276)

**Supplemental Figure 1.** Sanger sequencing results confirm a non-maternally inherited heterozygous variant in exon 16 of the X-linked CASK gene, c.1556T>C (p.M519T) in both Subject 1 and Subject 2.

M519T Case 1

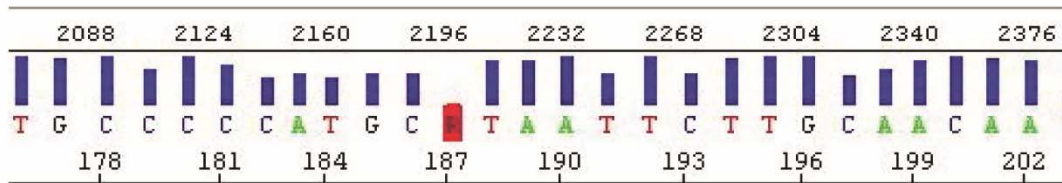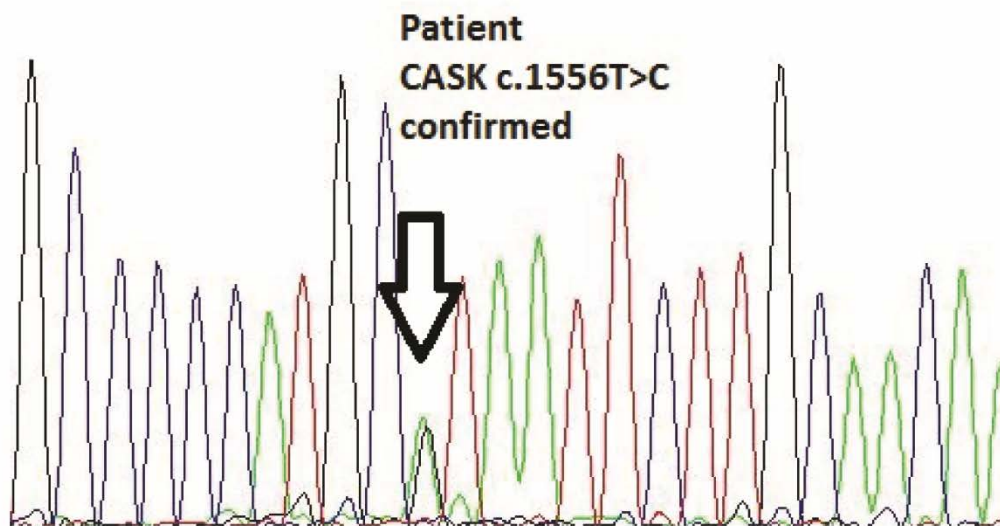

M519T Case 2

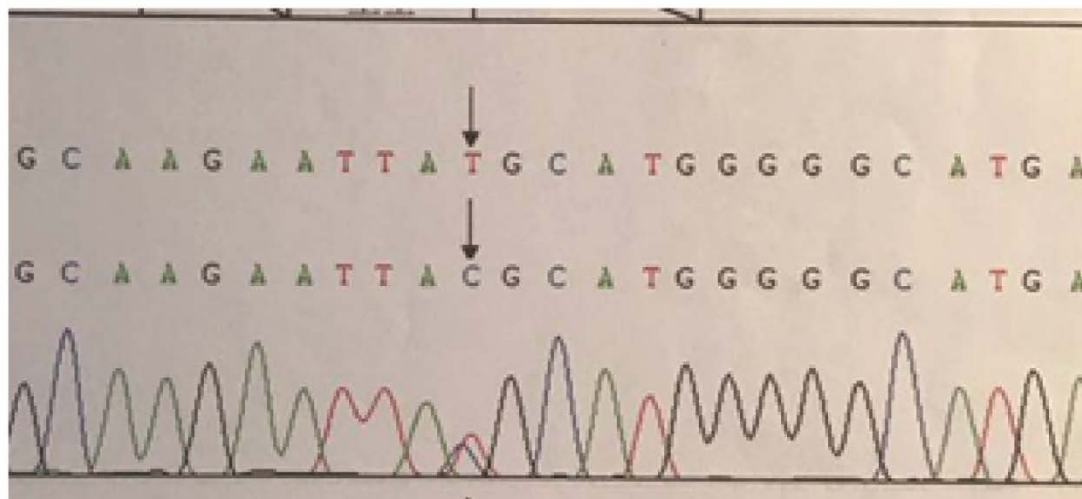

**Supplemental Figure 2.** A) Sequence conservation in CASK orthologs from nine species at the amino acid position associated with two CASK mutations of interest, G659D and W919R. Conserved residues are in white boxes; gray boxes indicate residue differences from the wild-type human sequence. B) Sequence-based predictions of pathogenicity for CASK mutations G659D and W919R from nine web-based bioinformatics algorithms. Algorithms that predict a particular mutation is damaging are shown in shades of red; algorithms that do not predict pathogenicity are in shades of blue. C) Change in protein stability induced by either the G659D mutation or W919R mutation as indicated by  $\Delta\Delta G$  (kcal/mol).  $\Delta\Delta G$  values were calculated using PoPMuSiC (o), FoldX (+), and Eris (x).

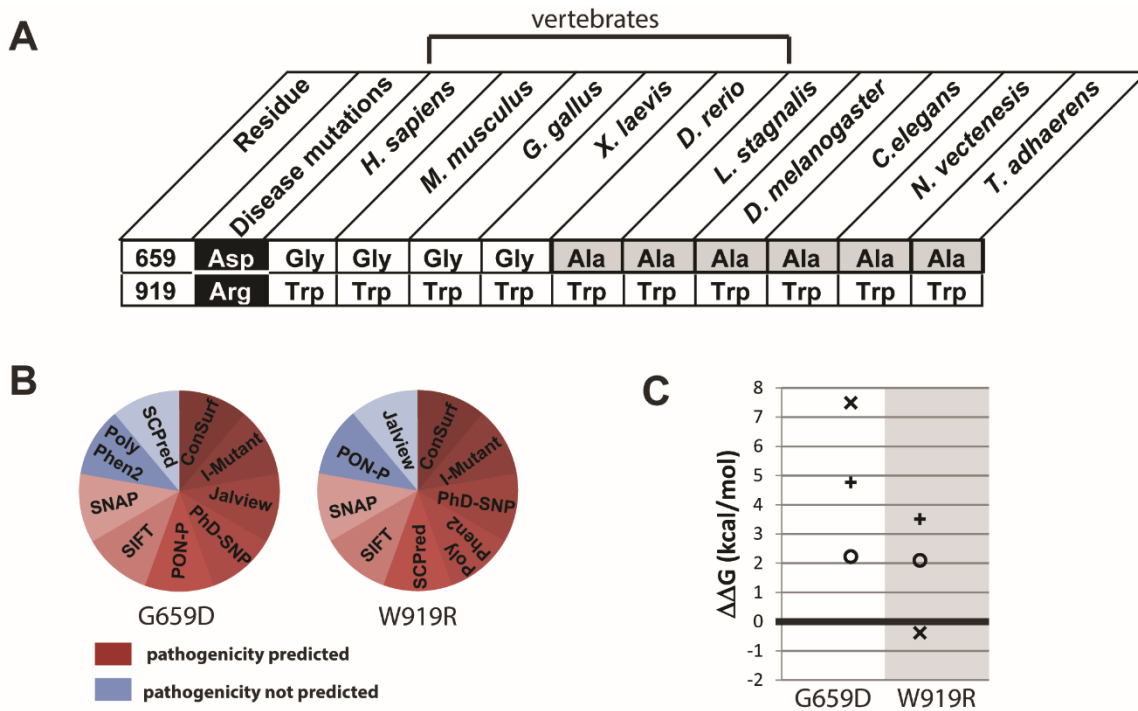

**Supplemental Figure 3.** Representative images of HEK293FT cells expressing GFP-CASK<sup>M519T</sup>, scale bar = 10 $\mu$ m. No aggregates were noted.

**GFP-CASK<sup>M519T</sup>**

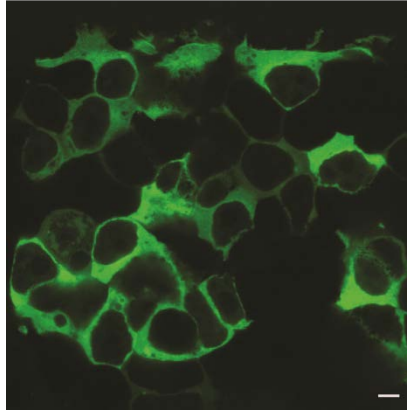

**Supplemental Figure 4.** Images of HEK293FT cells co-transfected with A) GFP-CASK<sup>G659D</sup> with mCherry Tbr1 and B) GFP-CASK<sup>W919R</sup> with mCherry Tbr1. Scale bars = 5μm.

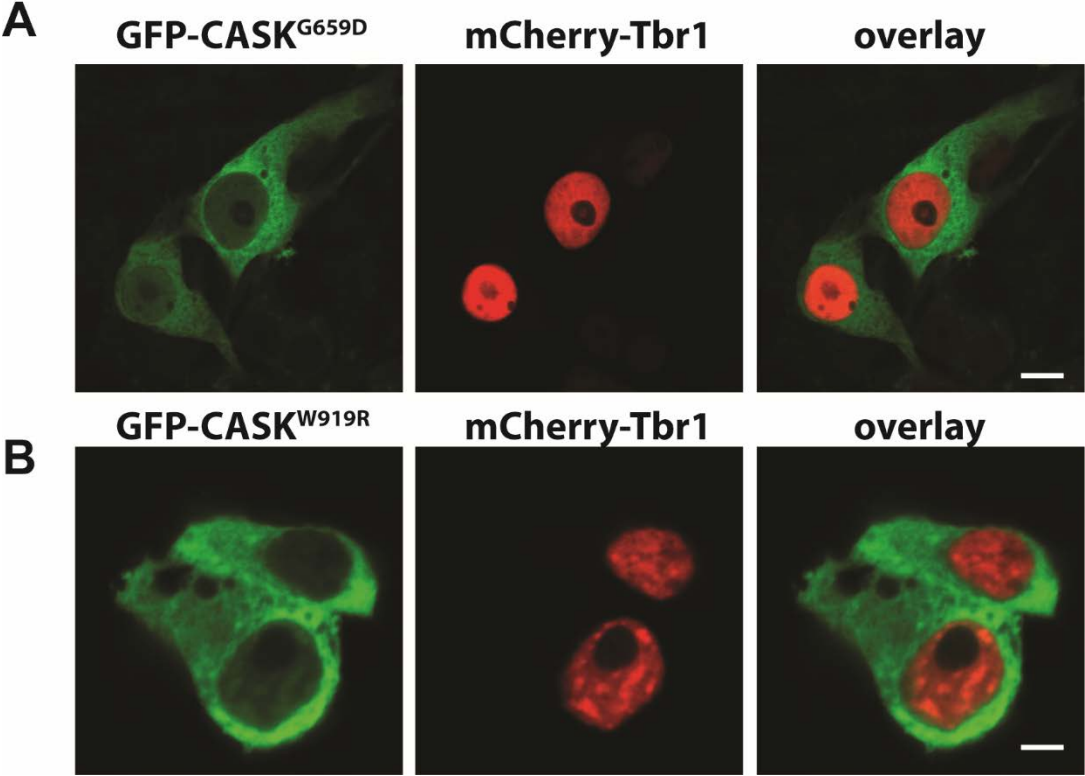

**Supplemental Figure 5.** Images of HEK293FT cells transfected with GFP-CASK<sup>R28L</sup>, GFP-CASK<sup>Y278H</sup>, GFP-CASK<sup>P396S</sup>, or GFP-CASK<sup>Y728C</sup> plasmid DNA co-expressed with neurexin-1 $\beta$ -FLAG (A,B). After 48 hours, cells were fixed, permeabilized and immunostained for neurexin. Scale bar = 5 $\mu$ m.

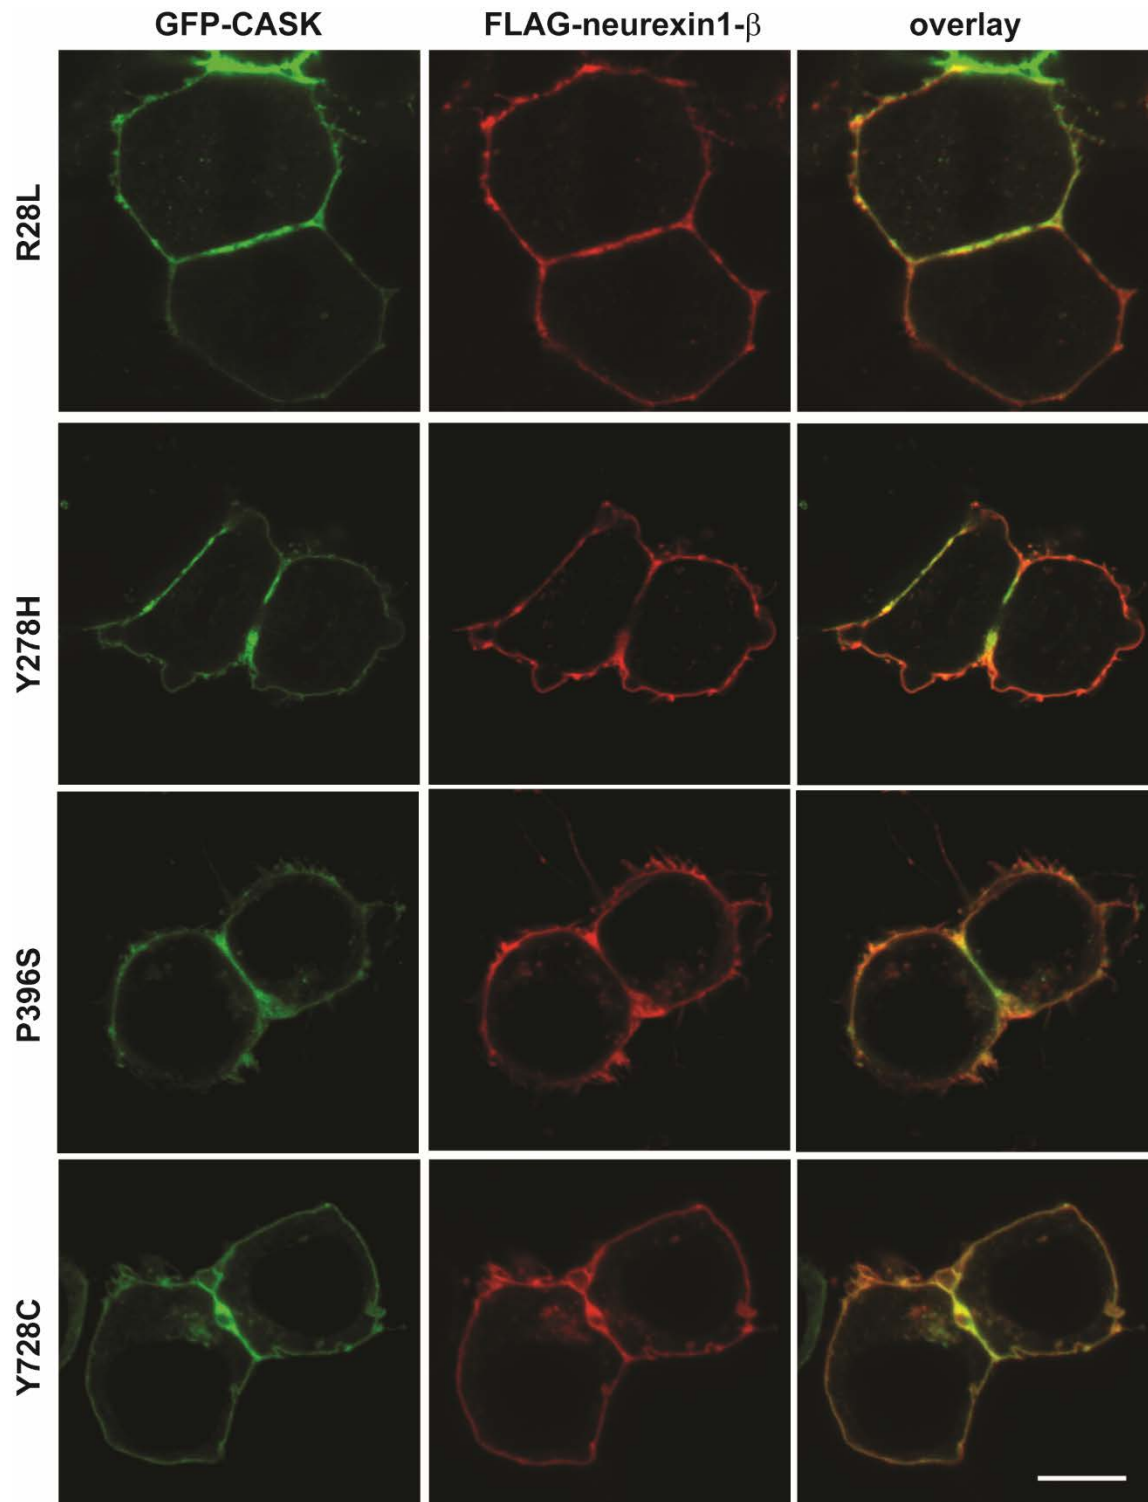

Supplement: NIHMS1013751-supplement-1.pdf [file NIHMS1013751-supplement-1.pdf]
